# Supplementary material for: Chlorinated Didemnins from the Tunicate Trididemnum solidum
Source: Mar Drugs. 2013 Nov 11;11(11):4478–86. doi: 10.3390/md11114478 (PMC3853740; doi:10.3390/md11114478)

# Supplementary Materials

Figure S1.  $^{13}\text{C}$  NMR spectrum of compound **1**.

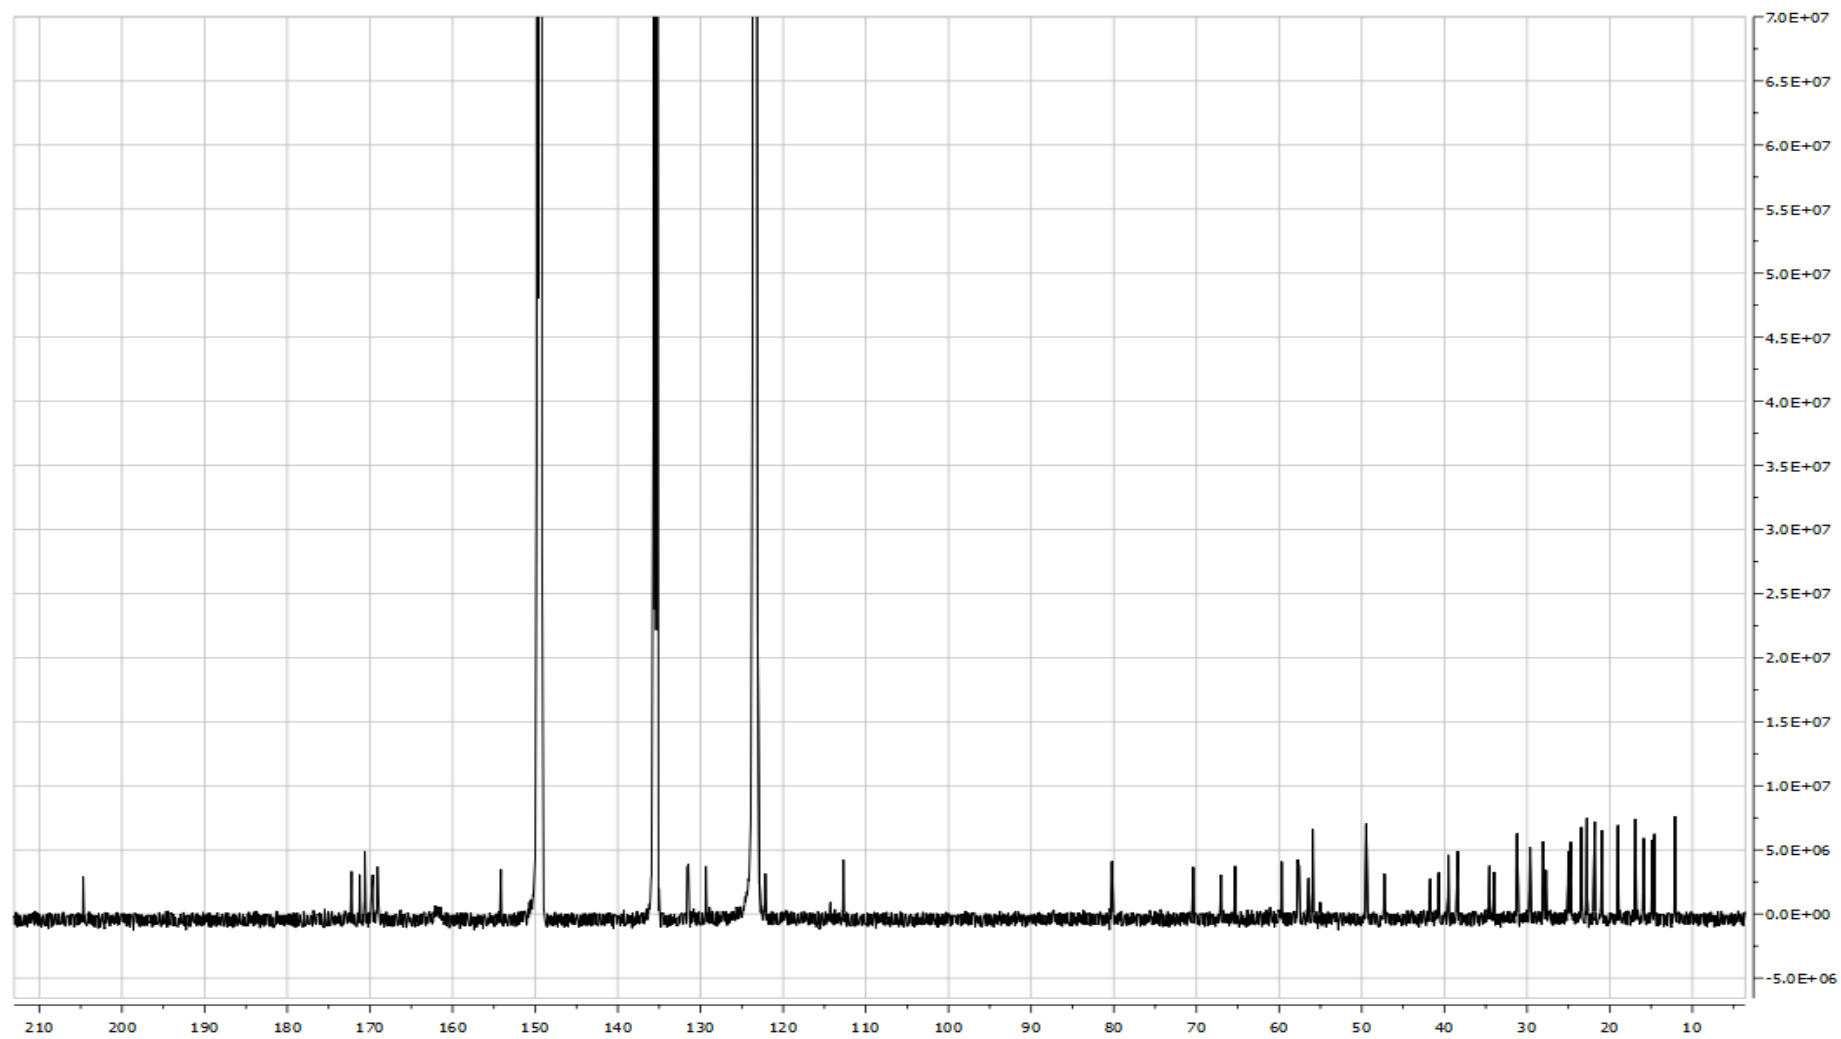

**Figure S2.**  $^1\text{H}$  NMR spectrum of compound 1.

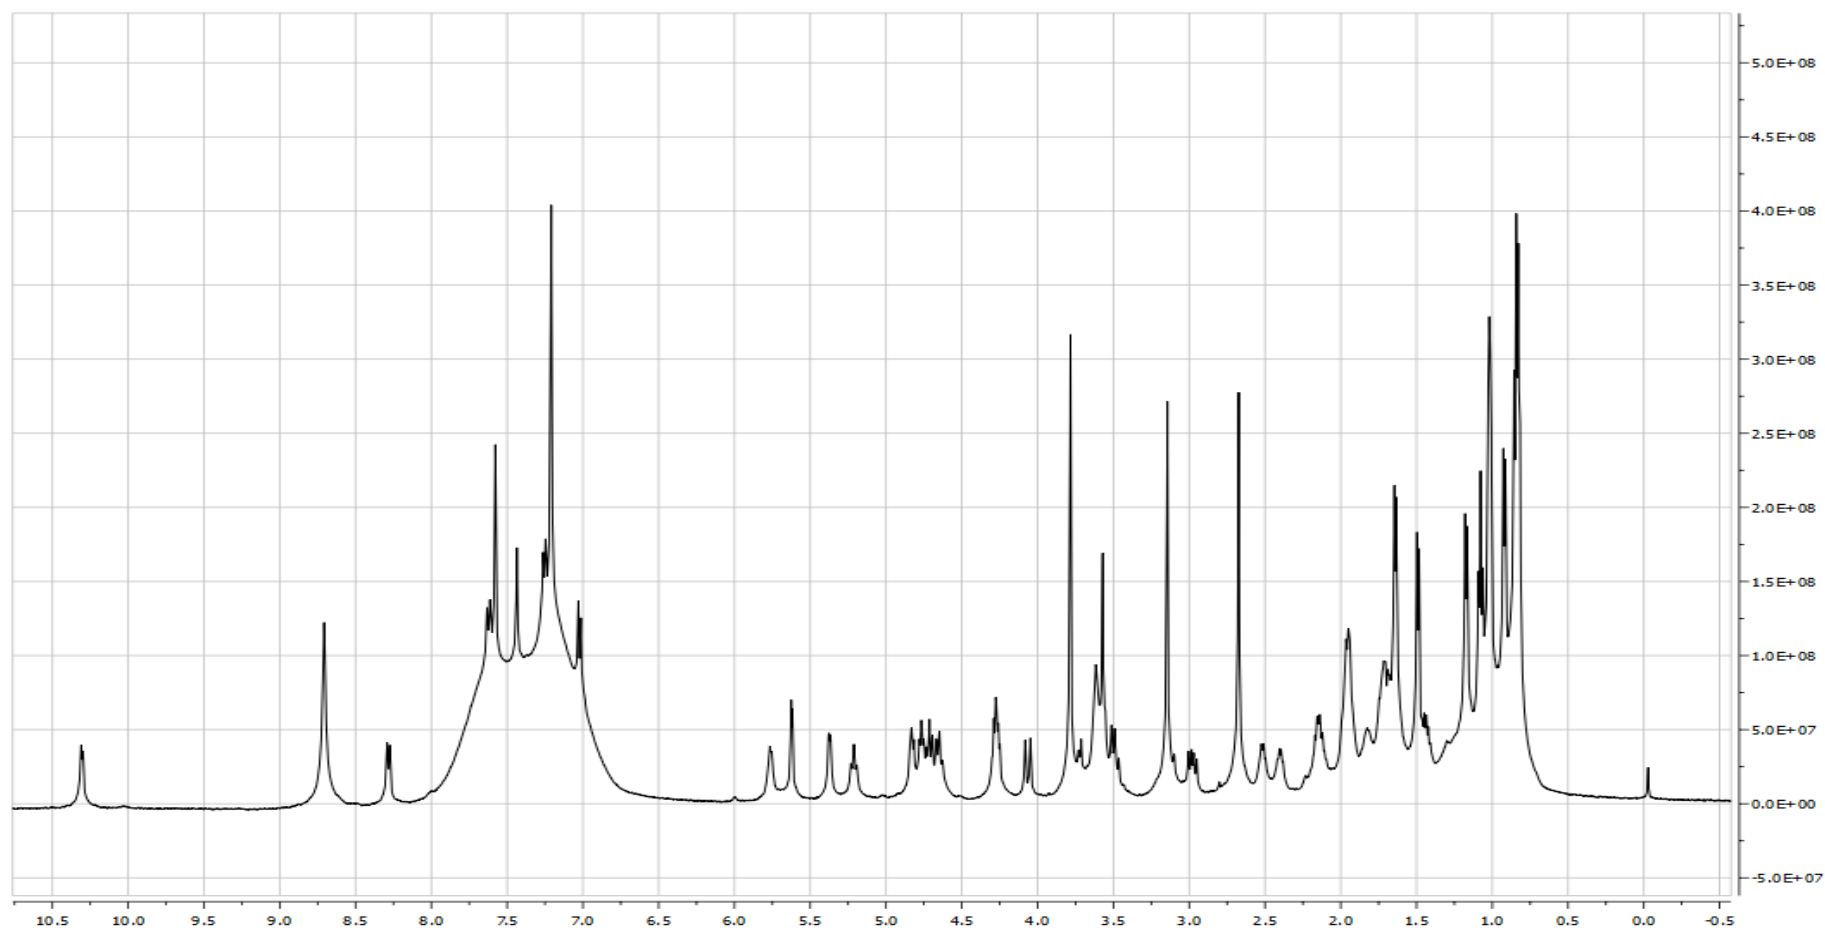

**Figure S3.** Mass spectrum of compound 1.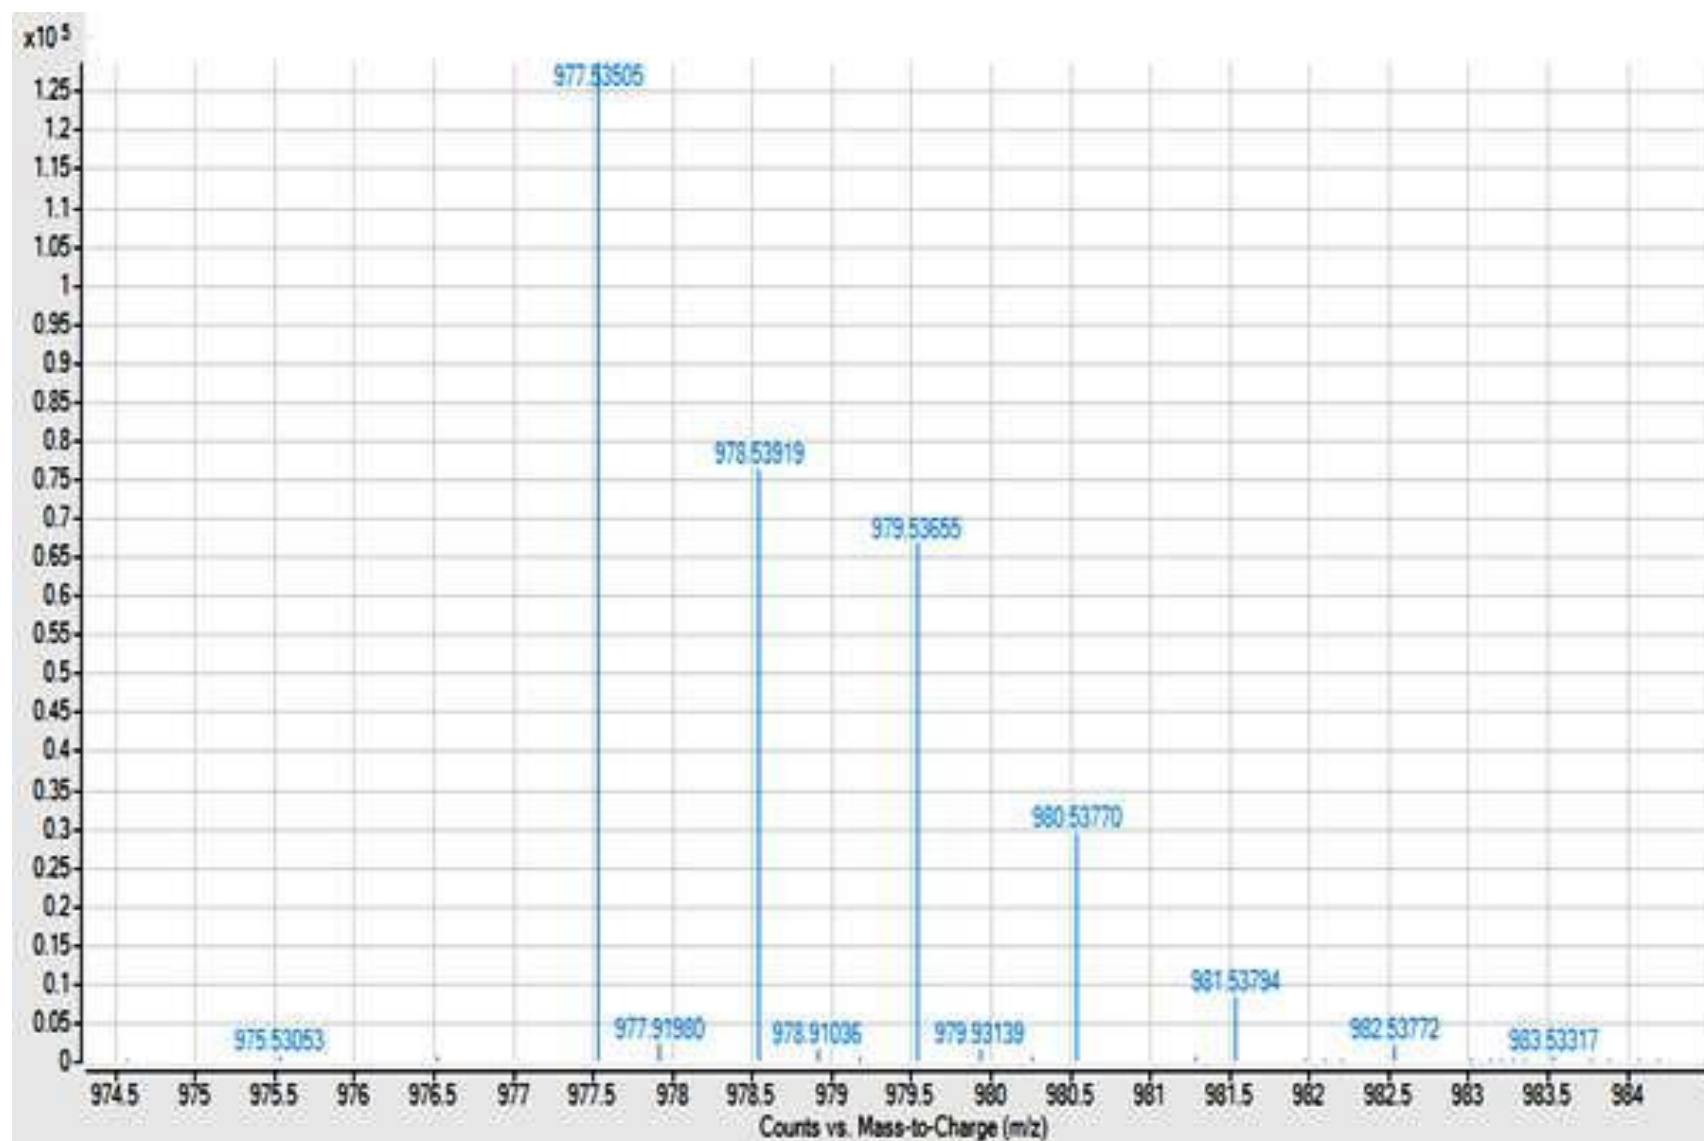

**Figure S4.** LC-TOF/MS chromatogram and MS spectrum of Marfey's derivatives of compound 1.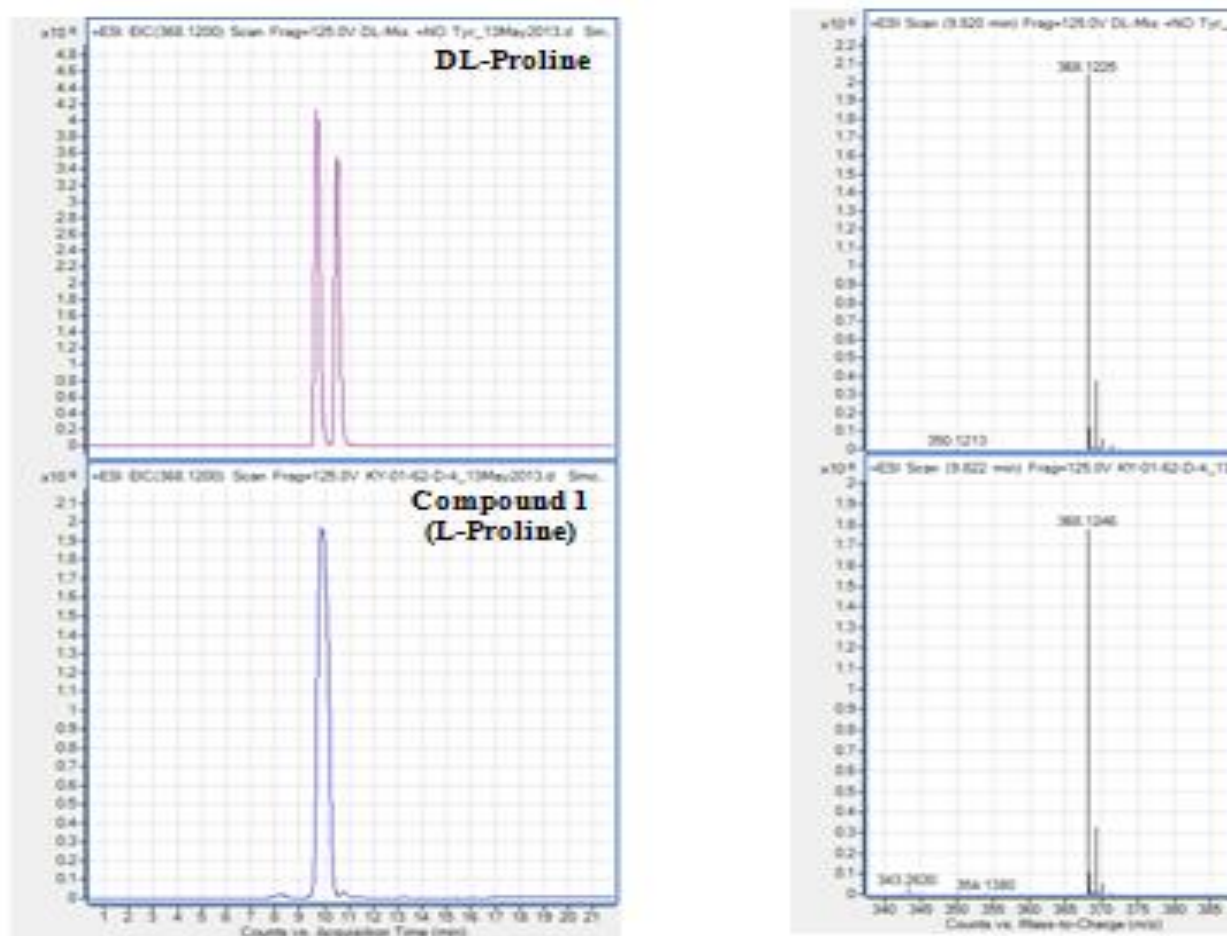

Figure S4. Cont.

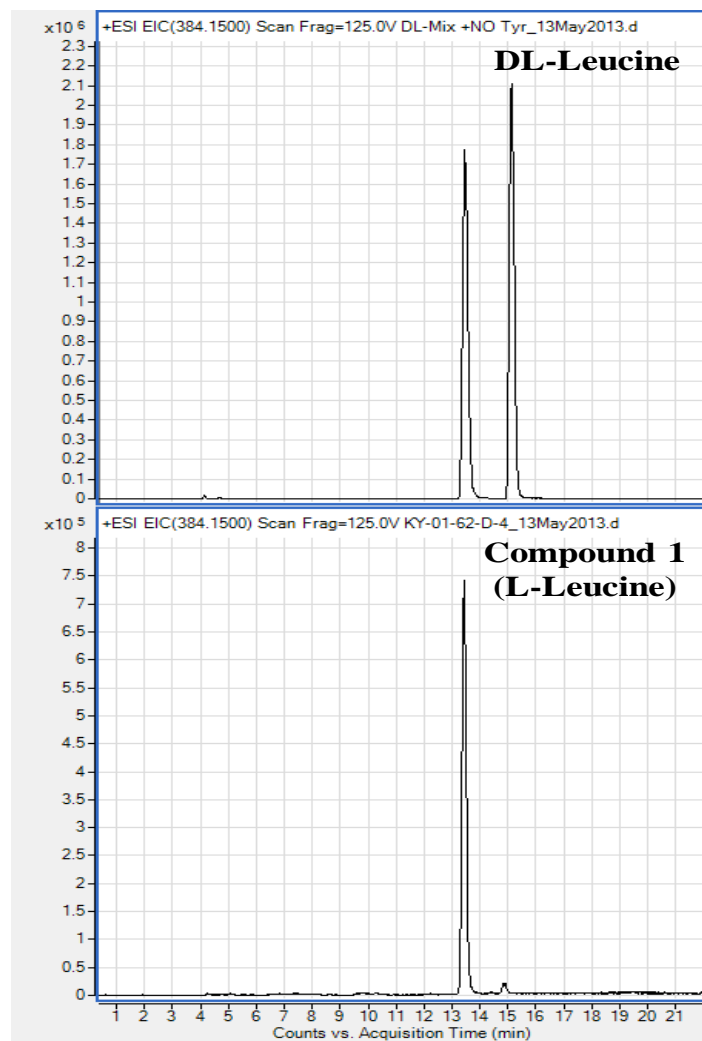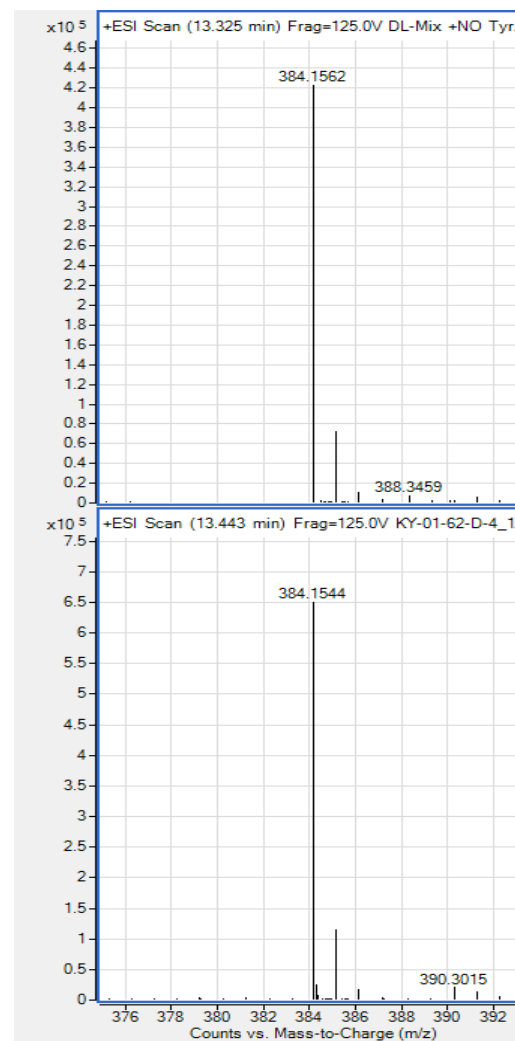

Figure S4. Cont.

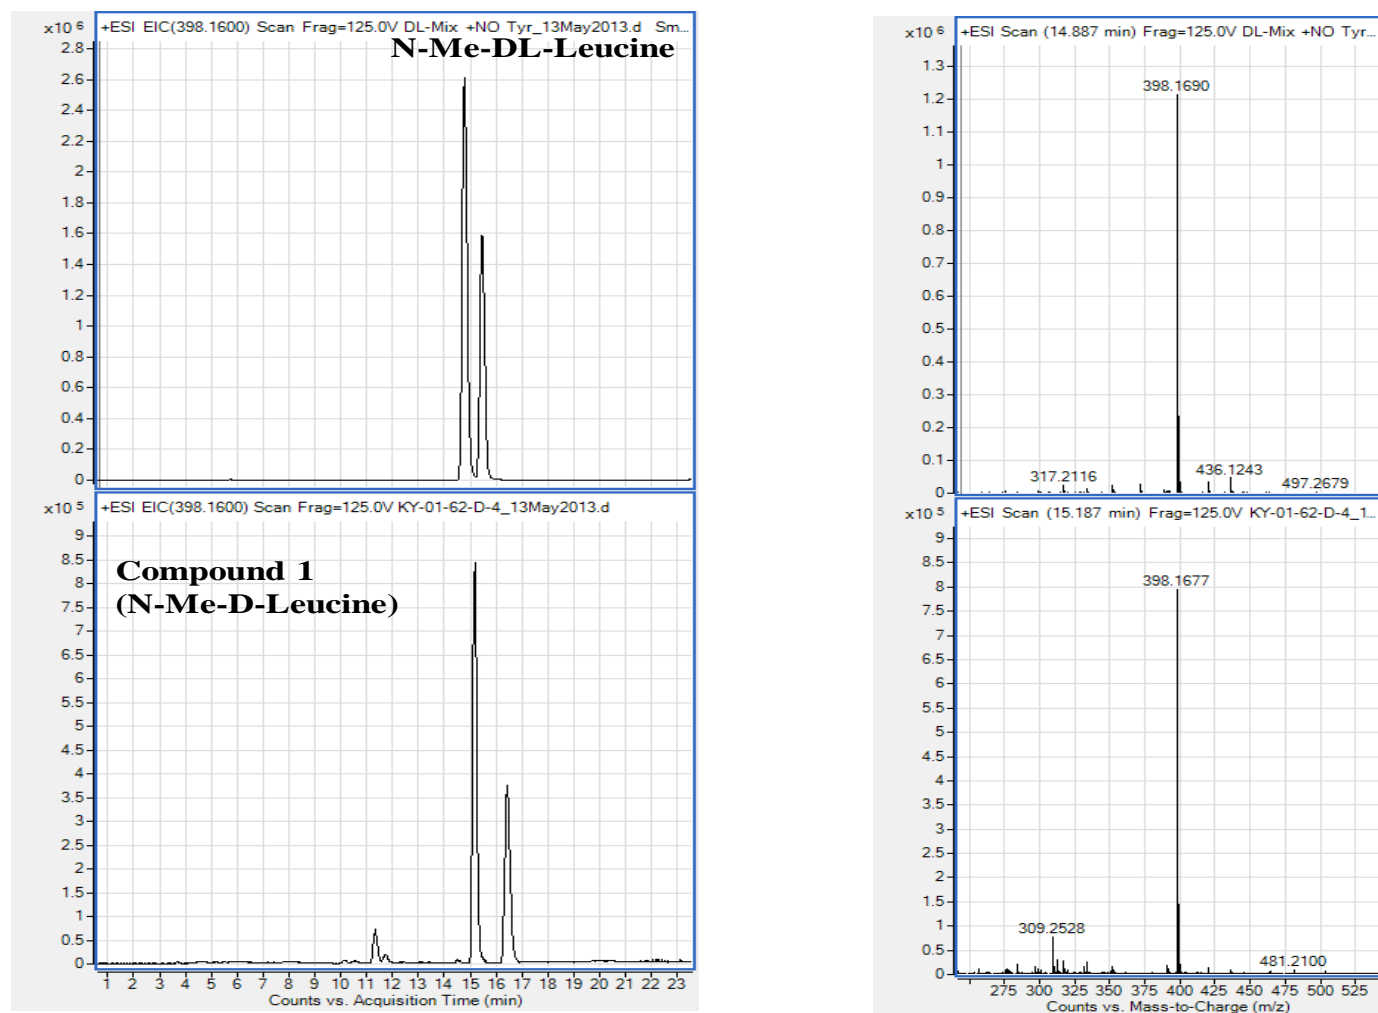

Figure S4. Cont.

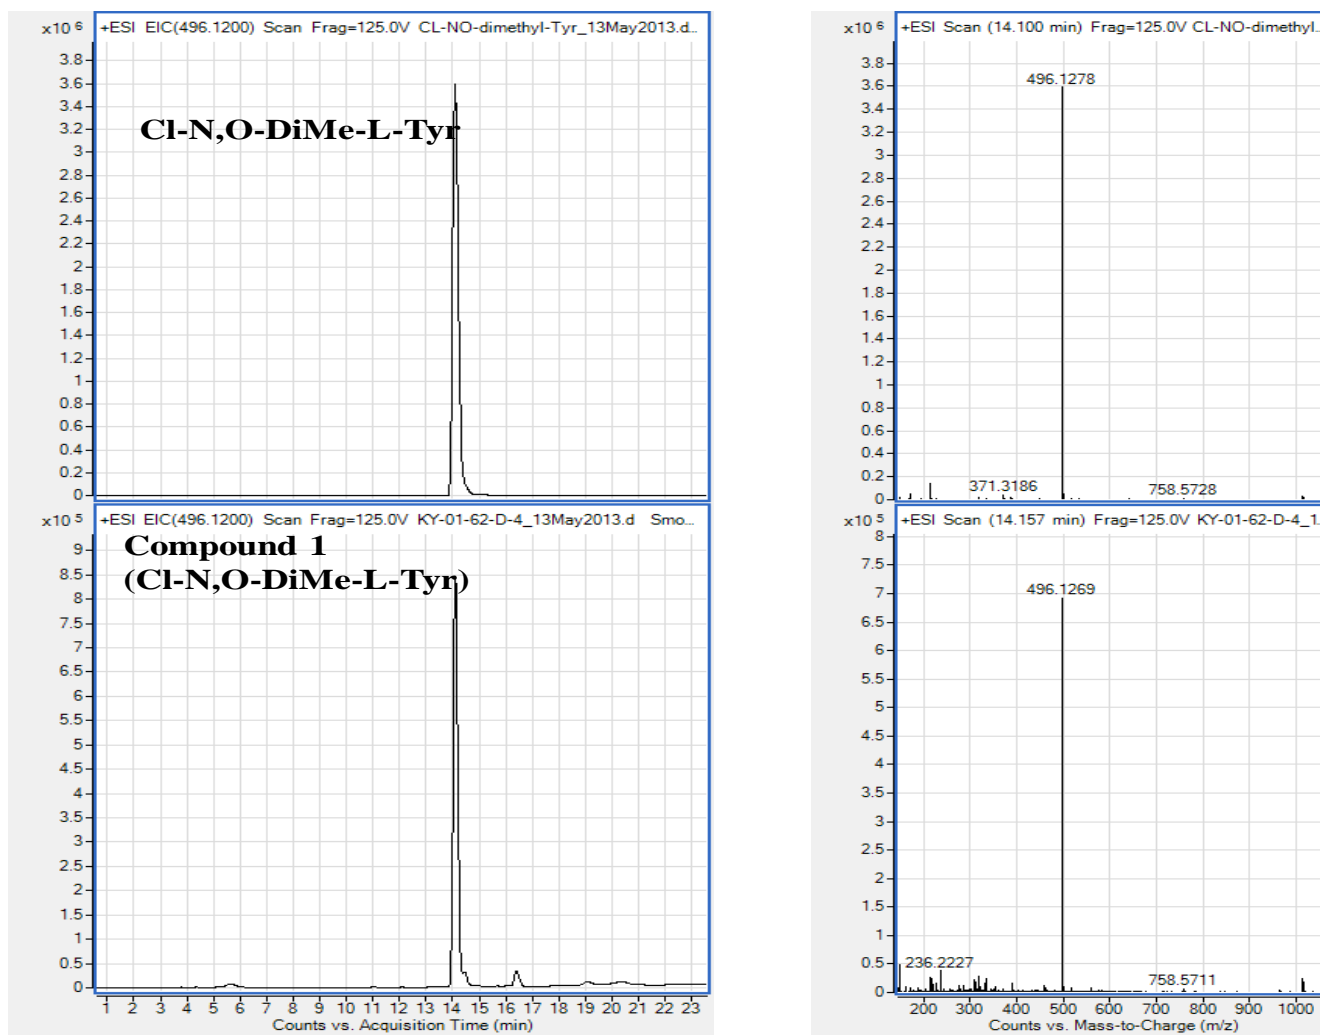

**Figure S5.** Mass spectrum of compound 2.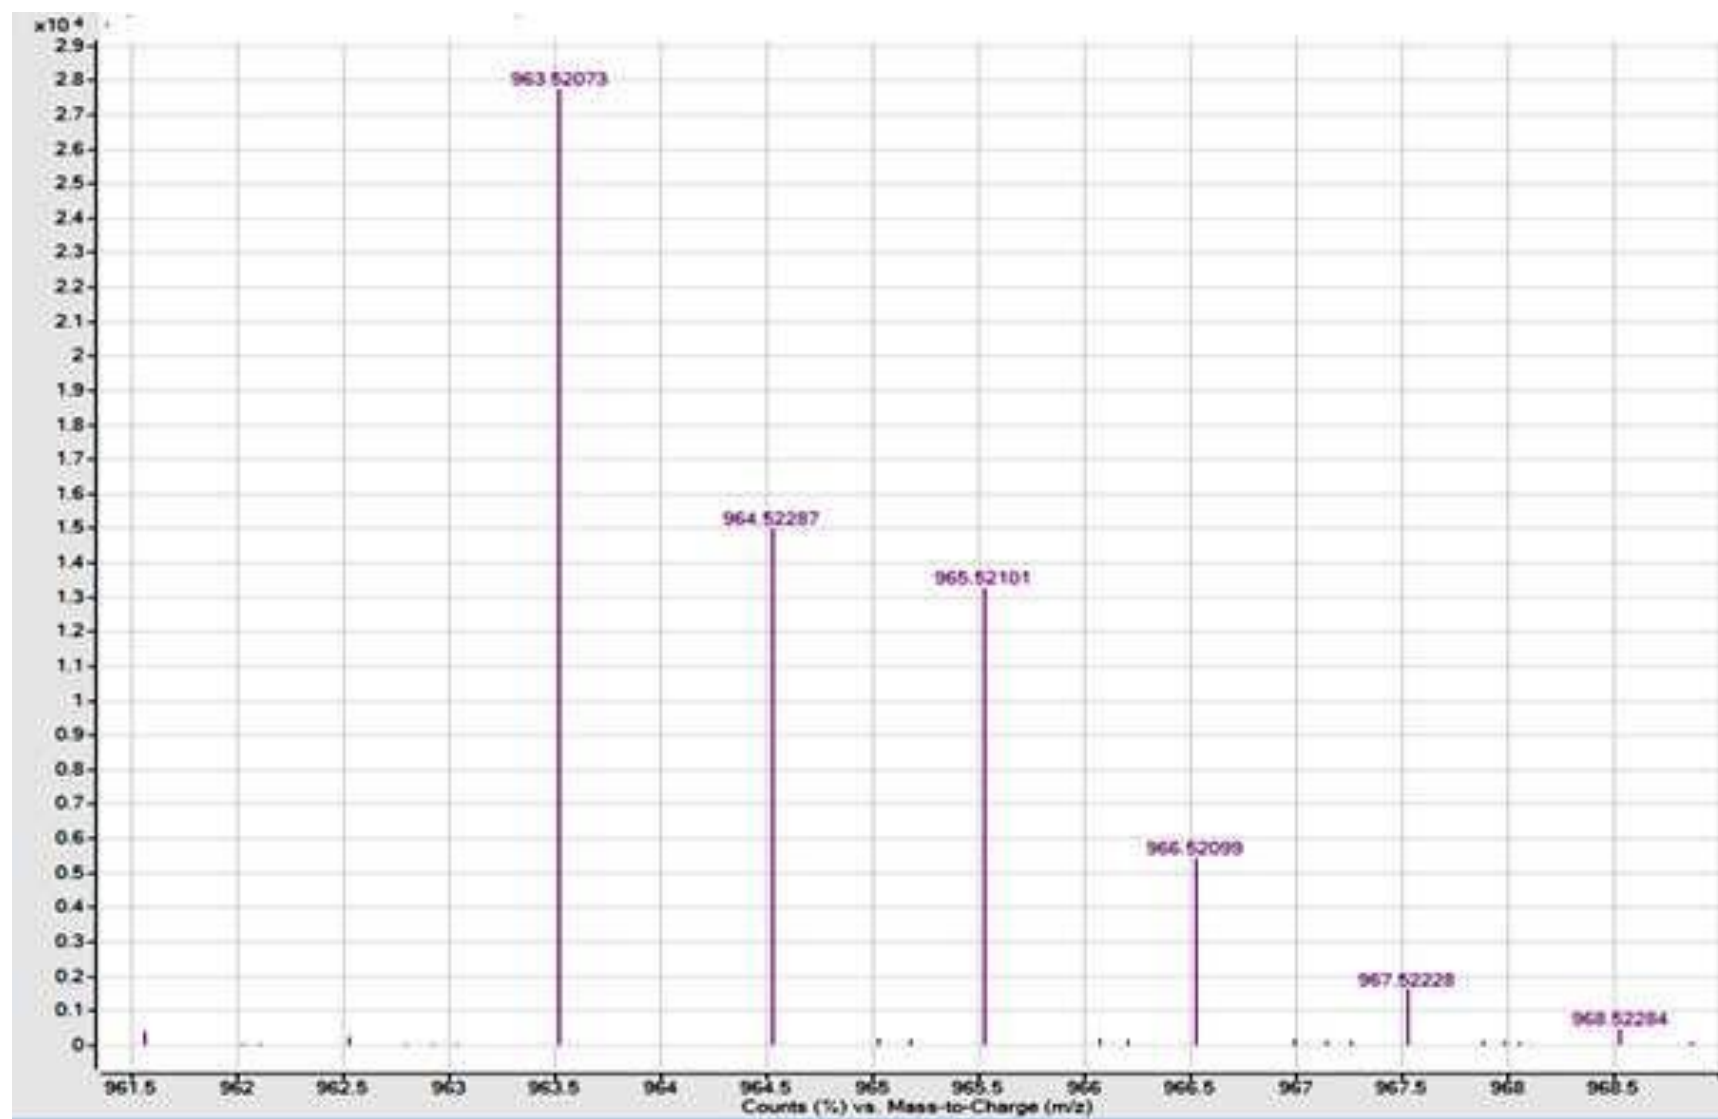

Supplement: Supplementary File 1 — Supplementary Materials (PDF, 376 KB) [file marinedrugs-11-04478-s001.pdf]
